# Supplementary material
Source: publisher site journal article supplement (https://www.spandidos-publications.com/931/downloadSupplementary)

Figure S1. Expression levels of PTEN mRNA in Rb cells with different transfections. Expression levels of PTEN mRNA in (A) Y79 and (B) WERI-Rb-1 cells were measured by quantitative PCR. \* $P < 0.05$ . C, control, untransfected cell; NC, negative control, cells transfected with empty vector; Rb, retinoblastoma; PLAC2, placenta-specific 2; siRNA, small interfering RNA.

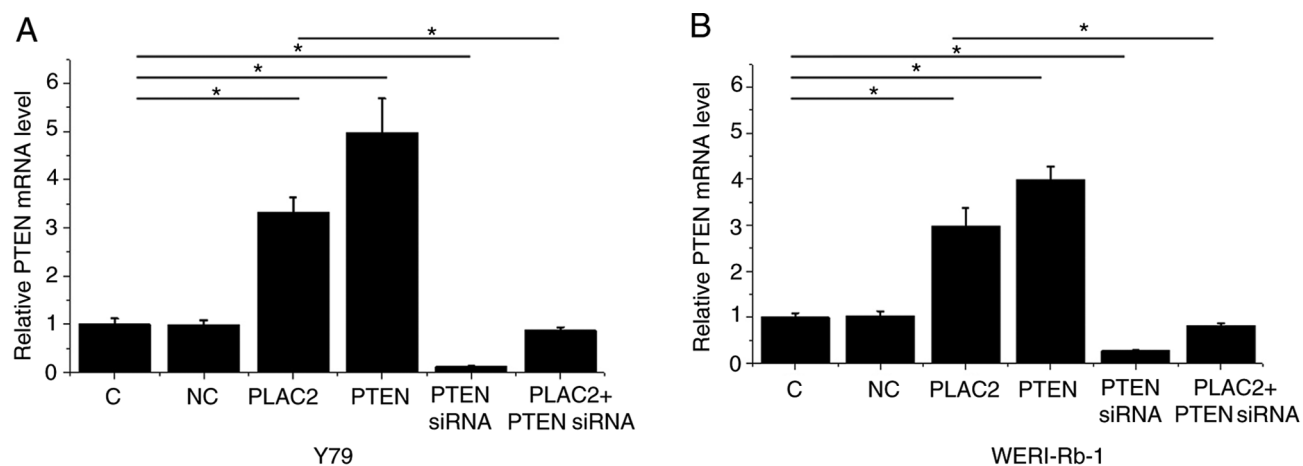

Supplement: Supplementary file 1 [file downloadSupplementary]
